# Supplementary material for: Window layer engineering of kesterite CZTSSe thin-film solar cells
Source: Royal Society of Chemistry journal article supplement (doi:10.1039/d5ta05857k), 2025-10-13
Supplement: d5ta05857k1.xlsx [file d5ta05857k1.xlsx]

## Sheet: Sheet1
wavelength (nm)	EQE (%)
300	35.85
320	6.45
340	5.05
360	8.59
380	21.86
400	45.18
420	61.07
440	70.5
460	76.56
480	80.47
500	83.13
520	88
540	91.78
560	92.88
580	92.51
600	90.31
620	89.19
640	87.44
660	85.77
680	83.81
700	81.83
720	80.06
740	78.78
760	77.53
780	76.67
800	75.62
820	74.4
840	73.9
860	73.1
880	71.28
900	69.92
920	68.02
940	66.01
960	63.39
980	59.98
1000	56.1
1020	49.71
1040	43.52
1060	38.46
1080	35.22
1100	29.82
1120	26.8
1140	21.5
1160	16.7
1180	12.8
1200	8.3
1220	5.1
1240	3.1
1260	1.6
1280	0.8
1300	0.4
