# Supplementary material for: Window layer engineering of kesterite CZTSSe thin-film solar cells
Source: Royal Society of Chemistry journal article supplement (doi:10.1039/d5ta05857k), 2025-10-13
Supplement: d5ta05857k4.xlsx [file d5ta05857k4.xlsx]

## Sheet: Sheet1
Voltage (V)	Current density (mA/cm2)
-50	36.99
-45	36.9833
-40	37.0167
-35	37.05
-30	37.0533
-25	36.9467
-20	36.9033
-15	36.91
-10	36.9267
-5	36.9033
0	36.85
5	36.8367
10	36.82
15	36.6267
20	36.6267
25	36.5767
30	36.5267
35	36.5167
40	36.55
45	36.5333
50	36.56
55	36.5567
60	36.6
65	36.6167
70	36.6067
75	36.5367
80	36.59
85	36.6433
90	36.6867
95	36.7133
100	36.68
105	36.4933
110	36.3633
115	36.3933
120	36.37
125	36.4033
130	36.3833
135	36.3367
140	36.3333
145	36.3767
150	36.3833
155	36.3633
160	36.3333
165	36.2933
170	36.2567
175	36.21
180	36.17
185	36.1533
190	36.1033
195	36.0733
200	36.04
205	35.9933
210	35.92
215	35.8633
220	35.8333
225	35.79
230	35.7033
235	35.6233
240	35.59
245	35.5233
250	35.4533
255	35.37
260	35.1833
265	35.0333
270	34.8733
275	34.6367
280	34.37
285	34.2433
290	34.0733
295	33.8433
300	33.5933
305	33.3867
310	33.02
315	32.55
320	32.1133
325	31.6233
330	31.3
335	30.8333
340	30.23
345	29.5433
350	28.8267
355	28.0667
360	27.2233
365	26.2767
370	25.2333
375	24.0867
380	22.8533
385	21.47
390	19.9833
395	18.4133
400	16.7
405	14.8567
410	12.9667
415	10.95
420	8.76333
425	6.46667
430	3.96
435	1.52068
440	-1.11218
445	-3.80333
450	-6.66
